# Supplementary material
Source: HighWire-hosted journal article supplement (http://www.jneurosci.org/highwire/filestream/598306/field_highwire_adjunct_files/3/Supplement_S3_JW.pdf)
Supplement: Supplement_S3_JW.pdf [file Supplement_S3_JW.pdf]

| Brain region                 | Cell type/ Vessel type | GGA1-expression in normal aged human brain                                                                                                                                                                                                                              | GGA1-expression in AD                                                                                                                                                                                                                                                   | AD-pathology                                                                             |
|------------------------------|------------------------|-------------------------------------------------------------------------------------------------------------------------------------------------------------------------------------------------------------------------------------------------------------------------|-------------------------------------------------------------------------------------------------------------------------------------------------------------------------------------------------------------------------------------------------------------------------|------------------------------------------------------------------------------------------|
| <b>Frontal cortex</b>        | Neurons                | Faintly-moderately stained pyramidalneurons in layers III and V; other neurons do not show a significant expression                                                                                                                                                     | Faintly-moderately stained pyramidalneurons in layers III and V; other neurons do not show a significant expression                                                                                                                                                     | Senile plaques exhibiting GGA1-positive microglial cells                                 |
|                              | Astrocytes             | -                                                                                                                                                                                                                                                                       | infrequently +                                                                                                                                                                                                                                                          |                                                                                          |
|                              | Oligodendrocytes       | -                                                                                                                                                                                                                                                                       | -                                                                                                                                                                                                                                                                       |                                                                                          |
|                              | Neuropil/ white matter | Neuropil +/- white matter -                                                                                                                                                                                                                                             | Neuropil +/- white matter -                                                                                                                                                                                                                                             |                                                                                          |
| <b>Occipital cortex</b>      | Neurons                | Unstained-faintly stained neurons in layers III and V; other neurons do not show a significant expression                                                                                                                                                               | Unstained-faintly stained neurons in layers III and V; other neurons do not show a significant expression                                                                                                                                                               | Senile plaques exhibiting GGA1-positive microglial cells                                 |
|                              | Astrocytes             | in a single case                                                                                                                                                                                                                                                        | infrequently +                                                                                                                                                                                                                                                          |                                                                                          |
|                              | Oligodendrocytes       | -                                                                                                                                                                                                                                                                       | -                                                                                                                                                                                                                                                                       |                                                                                          |
|                              | Neuropil/ white matter | Neuropil +/- white matter -                                                                                                                                                                                                                                             | Neuropil +/- white matter -                                                                                                                                                                                                                                             |                                                                                          |
| <b>Hippocampus</b>           | Neurons                | Subiculum, CA1: weakly positive; CA2-CA4: strongly positive; dentate gyrus: negative-faintly positive; temporal neocortex: pyramidal neurons inlayers III and V moderately-strongly positive; entorhinal cortex: pre- $\alpha$ neurons : strongly positive; other neuro | Subiculum, CA1: weakly positive; CA2-CA4: strongly positive; dentate gyrus: negative-faintly positive; temporal neocortex: pyramidal neurons inlayers III and V moderately-strongly positive; entorhinal cortex: pre- $\alpha$ neurons : strongly positive; other neuro | Senile plaques in CA1 and the subiculum sector exhibiting GGA1-positive microglial cells |
|                              | Astrocytes             | In single cases in CA4 positive                                                                                                                                                                                                                                         | In the temporal isocortex and in single cases in CA4 infrequently positive                                                                                                                                                                                              |                                                                                          |
|                              | Oligodendrocytes       | -                                                                                                                                                                                                                                                                       | -                                                                                                                                                                                                                                                                       |                                                                                          |
|                              | Neuropil/ white matter | Neuropil +/- white matter -                                                                                                                                                                                                                                             | Neuropil +/- white matter -                                                                                                                                                                                                                                             |                                                                                          |
| <b>Basal ganglia</b>         | Neurons                | Putamen: -; Globus pallidus: positive                                                                                                                                                                                                                                   | Putamen: -; Globus pallidus: positive                                                                                                                                                                                                                                   |                                                                                          |
|                              | Astrocytes             | In single cases positive                                                                                                                                                                                                                                                | In single cases positive                                                                                                                                                                                                                                                |                                                                                          |
|                              | Oligodendrocytes       | -                                                                                                                                                                                                                                                                       | -                                                                                                                                                                                                                                                                       |                                                                                          |
|                              | Neuropil/ white matter | Neuropil +/- white matter -                                                                                                                                                                                                                                             | Neuropil +/- white matter -                                                                                                                                                                                                                                             |                                                                                          |
| <b>Thalamus</b>              | Neurons                | Neurons moderately positive                                                                                                                                                                                                                                             | Neurons moderately positive                                                                                                                                                                                                                                             |                                                                                          |
|                              | Astrocytes             | -                                                                                                                                                                                                                                                                       | -                                                                                                                                                                                                                                                                       |                                                                                          |
|                              | Oligodendrocytes       | -                                                                                                                                                                                                                                                                       | -                                                                                                                                                                                                                                                                       |                                                                                          |
|                              | Neuropil/ white matter | Neuropil +/- white matter -                                                                                                                                                                                                                                             | Neuropil +/- white matter -                                                                                                                                                                                                                                             |                                                                                          |
| <b>Midbrain</b>              | Neurons                | Substantia nigra and central gray:-; oral raphe nucleus: positive                                                                                                                                                                                                       | Substantia nigra and central gray:-; oral raphe nucleus: positive                                                                                                                                                                                                       |                                                                                          |
|                              | Astrocytes             | -                                                                                                                                                                                                                                                                       | -                                                                                                                                                                                                                                                                       |                                                                                          |
|                              | Oligodendrocytes       | -                                                                                                                                                                                                                                                                       | -                                                                                                                                                                                                                                                                       |                                                                                          |
|                              | Neuropil/ white matter | Neuropil +/- white matter -                                                                                                                                                                                                                                             | Neuropil +/- white matter -                                                                                                                                                                                                                                             |                                                                                          |
| <b>Medulla oblongata</b>     | Neurons                | Brain stem nuclei: VIII-XII, neurons of the reticular nuclei, of the inferior olivary nucleus and the raphe obscurus nucleus; Neurons of the intermediate reticular zone (variable expression)                                                                          | Brain stem nuclei: VIII-XII, neurons of the reticular nuclei, of the inferior olivary nucleus and the raphe obscurus nucleus; Neurons of the intermediate reticular zone (variable expression)                                                                          |                                                                                          |
|                              | Astrocytes             | -                                                                                                                                                                                                                                                                       | -                                                                                                                                                                                                                                                                       |                                                                                          |
|                              | Oligodendrocytes       | -                                                                                                                                                                                                                                                                       | -                                                                                                                                                                                                                                                                       |                                                                                          |
|                              | Neuropil/ white matter | Neuropil +/- white matter -                                                                                                                                                                                                                                             | Neuropil +/- white matter -                                                                                                                                                                                                                                             |                                                                                          |
| <b>Cerebellum</b>            | Neurons                | Purkinje-cells: faintly-significantly positive positive; granule cells negative; dentate nucleus positive                                                                                                                                                               | Purkinje-cells: faintly-significantly positive positive; granule cells negative; dentate nucleus positive                                                                                                                                                               |                                                                                          |
|                              | Astrocytes             | -                                                                                                                                                                                                                                                                       | -                                                                                                                                                                                                                                                                       |                                                                                          |
|                              | Oligodendrocytes       | -                                                                                                                                                                                                                                                                       | -                                                                                                                                                                                                                                                                       |                                                                                          |
|                              | Neuropil/ white matter | Neuropil +/- white matter -                                                                                                                                                                                                                                             | Neuropil +/- white matter -                                                                                                                                                                                                                                             |                                                                                          |
| <b>Leptomenigeal vessels</b> | Arteries               | smooth muscle cells: +                                                                                                                                                                                                                                                  | smooth muscle cells: +                                                                                                                                                                                                                                                  | Reduction of GGA1-positive smooth muscle cells due to CAA                                |
|                              | Veins                  | smooth muscle cells: +                                                                                                                                                                                                                                                  | smooth muscle cells: +                                                                                                                                                                                                                                                  | Reduction of GGA1-positive smooth muscle cells due to CAA                                |
| <b>Cortical vessels</b>      | Arteries               | smooth muscle cells: +                                                                                                                                                                                                                                                  | smooth muscle cells: +                                                                                                                                                                                                                                                  | Reduction of GGA1-positive smooth muscle cells due to CAA                                |
|                              | Veins                  | smooth muscle cells: +                                                                                                                                                                                                                                                  | smooth muscle cells: +                                                                                                                                                                                                                                                  | -                                                                                        |
|                              | Capillaries            | -                                                                                                                                                                                                                                                                       | -                                                                                                                                                                                                                                                                       | -                                                                                        |
| <b>White matter vessels</b>  | Arteries               | smooth muscle cells: +                                                                                                                                                                                                                                                  | smooth muscle cells: +                                                                                                                                                                                                                                                  | Reduction of GGA1-positive smooth muscle cells/ endothelial proliferation due to AS/LH   |
|                              | Veins                  | smooth muscle cells: +                                                                                                                                                                                                                                                  | smooth muscle cells: +                                                                                                                                                                                                                                                  | -                                                                                        |
|                              | Capillaries            | -                                                                                                                                                                                                                                                                       | -                                                                                                                                                                                                                                                                       | -                                                                                        |
